# Supplementary material for: Effectiveness of exercises by telerehabilitation on pain, physical function and quality of life in people with physical disabilities: a systematic review of randomised controlled trials with GRADE recommendations
Source: HighWire-hosted journal article supplement (doi:10.1136/bjsports-2019-101375), 2020-10-15
Supplement: bjsports-2019-101375supp001_data_supplement.pdf [file bjsports-2019-101375supp001_data_supplement.pdf]

**Supplementary material 1.** Search strategy conducted in May 2018 and updated in February 2020.

***OID (Cochrane, Medline, Embase, AMED, Psychinfo)***

1. Randomized Controlled Trial.mp. or Randomized Controlled Trial/
2. Random Allocation/ or randomised controlled trial.mp.
3. Controlled Clinical Trial/
4. Telerehabilitation.mp. [mp=ab, hw, kw, ti, ot, tx, ct, sh, tc, id, tm, tn, dm, mf, dv, fx, dq, nm, kf, px, rx, an, ui, sy]
5. Tele-rehabilitation\*.mp. [mp=ab, hw, kw, ti, ot, tx, ct, sh, tc, id, tm, tn, dm, mf, dv, fx, dq, nm, kf, px, rx, an, ui, sy]
6. Tele rehabilitation\*.mp. [mp=ab, hw, kw, ti, ot, tx, ct, sh, tc, id, tm, tn, dm, mf, dv, fx, dq, nm, kf, px, rx, an, ui, sy]
7. Telemedicine.mp. [mp=ab, hw, kw, ti, ot, tx, ct, sh, tc, id, tm, tn, dm, mf, dv, fx, dq, nm, kf, px, rx, an, ui, sy]
8. telecommunication\*.mp. [mp=ab, hw, kw, ti, ot, tx, ct, sh, tc, id, tm, tn, dm, mf, dv, fx, dq, nm, kf, px, rx, an, ui, sy]
9. telehealth.mp. [mp=ab, hw, kw, ti, ot, tx, ct, sh, tc, id, tm, tn, dm, mf, dv, fx, dq, nm, kf, px, rx, an, ui, sy]
10. telehealthcare.mp. [mp=ab, hw, kw, ti, ot, tx, ct, sh, tc, id, tm, tn, dm, mf, dv, fx, dq, nm, kf, px, rx, an, ui, sy]
11. telecare.mp. [mp=ab, hw, kw, ti, ot, tx, ct, sh, tc, id, tm, tn, dm, mf, dv, fx, dq, nm, kf, px, rx, an, ui, sy]
12. teletherapy.mp. [mp=ab, hw, kw, ti, ot, tx, ct, sh, tc, id, tm, tn, dm, mf, dv, fx, dq, nm, kf, px, rx, an, ui, sy]
13. telecoaching.mp. [mp=ab, hw, kw, ti, ot, tx, ct, sh, tc, id, tm, tn, dm, mf, dv, fx, dq, nm, kf, px, rx, an, ui, sy]
14. e-health.mp. [mp=ab, hw, kw, ti, ot, tx, ct, sh, tc, id, tm, tn, dm, mf, dv, fx, dq, nm, kf, px, rx, an, ui, sy]
15. e-medicine.mp. [mp=ab, hw, kw, ti, ot, tx, ct, sh, tc, id, tm, tn, dm, mf, dv, fx, dq, nm, kf, px, rx, an, ui, sy]
16. Remote Rehabilitation\*.mp. [mp=ab, hw, kw, ti, ot, tx, ct, sh, tc, id, tm, tn, dm, mf, dv, fx, dq, nm, kf, px, rx, an, ui, sy]
17. Rehabilitation\*, Remote.mp. [mp=ab, hw, kw, ti, ot, tx, ct, sh, tc, id, tm, tn, dm, mf, dv, fx, dq, nm, kf, px, rx, an, ui, sy]
18. Virtual\* Rehabilitation\*.mp. [mp=ab, hw, kw, ti, ot, tx, ct, sh, tc, id, tm, tn, dm, mf, dv, fx, dq, nm, kf, px, rx, an, ui, sy]
19. Rehabilitation\*, Virtual\*.mp. [mp=ab, hw, kw, ti, ot, tx, ct, sh, tc, id, tm, tn, dm, mf, dv, fx, dq, nm, kf, px, rx, an, ui, sy]
20. Delivery of Health Care.mp. [mp=ab, hw, kw, ti, ot, tx, ct, sh, tc, id, tm, tn, dm, mf, dv, fx, dq, nm, kf, px, rx, an, ui, sy]
21. Videoconferencing.mp. [mp=ab, hw, kw, ti, ot, tx, ct, sh, tc, id, tm, tn, dm, mf, dv, fx, dq, nm, kf, px, rx, an, ui, sy]
22. Remote Consultation.mp. [mp=ab, hw, kw, ti, ot, tx, ct, sh, tc, id, tm, tn, dm, mf, dv, fx, dq, nm, kf, px, rx, an, ui, sy]
23. User-Computer Interface.mp. [mp=ab, hw, kw, ti, ot, tx, ct, sh, tc, id, tm, tn, dm, mf, dv, fx, dq, nm, kf, px, rx, an, ui, sy]
24. Computer Communication Network\*.mp. [mp=ab, hw, kw, ti, ot, tx, ct, sh, tc, id, tm, tn, dm, mf, dv, fx, dq, nm, kf, px, rx, an, ui, sy]
25. mobile health.mp. [mp=ab, hw, kw, ti, ot, tx, ct, sh, tc, id, tm, tn, dm, mf, dv, fx,

dq, nm, kf, px, rx, an, ui, sy]

26. web-based.mp. [mp=ab, hw, kw, ti, ot, tx, ct, sh, tc, id, tm, tn, dm, mf, dv, fx, dq, nm, kf, px, rx, an, ui, sy]

27. Service delivery.mp. [mp=ab, hw, kw, ti, ot, tx, ct, sh, tc, id, tm, tn, dm, mf, dv, fx, dq, nm, kf, px, rx, an, ui, sy]

28. home.mp. [mp=ab, hw, kw, ti, ot, tx, ct, sh, tc, id, tm, tn, dm, mf, dv, fx, dq, nm, kf, px, rx, an, ui, sy]

29. community.mp. [mp=ab, hw, kw, ti, ot, tx, ct, sh, tc, id, tm, tn, dm, mf, dv, fx, dq, nm, kf, px, rx, an, ui, sy]

30. dwelling community.mp. [mp=ab, hw, kw, ti, ot, tx, ct, sh, tc, id, tm, tn, dm, mf, dv, fx, dq, nm, kf, px, rx, an, ui, sy]

31. Home rehabilitation\*.mp. [mp=ab, hw, kw, ti, ot, tx, ct, sh, tc, id, tm, tn, dm, mf, dv, fx, dq, nm, kf, px, rx, an, ui, sy]

32. Community Healthcare\*.mp. [mp=ab, hw, kw, ti, ot, tx, ct, sh, tc, id, tm, tn, dm, mf, dv, fx, dq, nm, kf, px, rx, an, ui, sy]

33. Healthcare\*, Community.mp. [mp=ab, hw, kw, ti, ot, tx, ct, sh, tc, id, tm, tn, dm, mf, dv, fx, dq, nm, kf, px, rx, an, ui, sy]

34. Health Care, Community.mp. [mp=ab, hw, kw, ti, ot, tx, ct, sh, tc, id, tm, tn, dm, mf, dv, fx, dq, nm, kf, px, rx, an, ui, sy]

35. Care, Community Health.mp. [mp=ab, hw, kw, ti, ot, tx, ct, sh, tc, id, tm, tn, dm, mf, dv, fx, dq, nm, kf, px, rx, an, ui, sy]

36. Community Health Care.mp. [mp=ab, hw, kw, ti, ot, tx, ct, sh, tc, id, tm, tn, dm, mf, dv, fx, dq, nm, kf, px, rx, an, ui, sy]

37. Community Health Service\*.mp. [mp=ab, hw, kw, ti, ot, tx, ct, sh, tc, id, tm, tn, dm, mf, dv, fx, dq, nm, kf, px, rx, an, ui, sy]

38. Health Service\*, Community.mp. [mp=ab, hw, kw, ti, ot, tx, ct, sh, tc, id, tm, tn, dm, mf, dv, fx, dq, nm, kf, px, rx, an, ui, sy]

39. Service\*, Community Health.mp. [mp=ab, hw, kw, ti, ot, tx, ct, sh, tc, id, tm, tn, dm, mf, dv, fx, dq, nm, kf, px, rx, an, ui, sy]

40. Primary health care.mp. [mp=ab, hw, kw, ti, ot, tx, ct, sh, tc, id, tm, tn, dm, mf, dv, fx, dq, nm, kf, px, rx, an, ui, sy]

41. Primary care.mp. [mp=ab, hw, kw, ti, ot, tx, ct, sh, tc, id, tm, tn, dm, mf, dv, fx, dq, nm, kf, px, rx, an, ui, sy]

42. 28 or 29 or 30 or 31 or 32 or 33 or 34 or 35 or 36 or 37 or 38 or 39 or 40 or 41

43. 4 or 5 or 6 or 7 or 8 or 9 or 10 or 11 or 12 or 13 or 14 or 15 or 16 or 17 or 18 or 19 or 20 or 21 or 22 or 23 or 24 or 25 or 26 or 27

44. 1 or 2 or 3

45. 42 and 43 and 44

### ***EBSCO (Sportdiscus and CINAHL)***

(Tele\*) AND (Randomised controlled trial OR randomized controlled trial OR random allocation OR comparative stud\* OR controlled trial)

### ***PEDro***

Abstract & Title: tele\*

Therapy: no selection

Problem: no selection

Body Part: no selection

Subdiscipline: no selection

Topic: no selection

Method: clinical trial
