# Supplementary material for: Effectiveness of exercises by telerehabilitation on pain, physical function and quality of life in people with physical disabilities: a systematic review of randomised controlled trials with GRADE recommendations
Source: HighWire-hosted journal article supplement (doi:10.1136/bjsports-2019-101375), 2020-10-15
Supplement: bjsports-2019-101375supp002_data_supplement.pdf [file bjsports-2019-101375supp002_data_supplement.pdf]

## Supplementary material 5. Data extraction

| Study                     | EG |      |      | CG |      |      | Comments                |
|---------------------------|----|------|------|----|------|------|-------------------------|
|                           | n  | Mean | SD   | n  | Mean | SD   |                         |
| <b>Musculoskeletal</b>    |    |      |      |    |      |      |                         |
| Buhrman M., et al. (2004) | 22 | 34.3 | 16.8 | 29 | 39.6 | 16.3 | *Instrument: Pain diary |

1.1 Pain Short-term (Telerehabilitation x Control)

| Study                              | EG |        |       | OI  |       |       | Comments                                                                             |
|------------------------------------|----|--------|-------|-----|-------|-------|--------------------------------------------------------------------------------------|
|                                    | n  | Mean   | SD    | n   | Mean  | SD    |                                                                                      |
| <b>Postoperative orthopaedic</b>   |    |        |       |     |       |       |                                                                                      |
| Chen M. et al. (2016)              | 94 | 16.1   | 6.2   | 93  | 18.4  | 6.7   | *Instrument: VAS                                                                     |
| Moffet. H., et al. (2015)          | 98 | -77.2  | 1.4   | 100 | -76.9 | 1.4   | *Instrument: WOMAC Subscale Pain; *Imputed from standard errors                      |
| Piqueras M., et al. (2013)         | 72 | -0.69  | 1.44  | 70  | -0.61 | 1.87  | *Instrument: VAS                                                                     |
| Pastora-Bernal JM (2018)           | 8  | -11.38 | 0.46  | 10  | -10.3 | 0.61  | *Instrument: Constant–Murley Test Subscale pain                                      |
| Coronado, R. A., et al. (2019)     | 15 | 2.5    | 2.5   | 15  | 3.5   | 1.9   | *Instrument: Numeric Rating Scale (NRS)                                              |
| <b>Musculoskeletal</b>             |    |        |       |     |       |       |                                                                                      |
| Odole A. C. and O. D. Ojo (2013)   | 25 | 22.4   | 13.76 | 25  | 18.84 | 15.99 | *Instrument: VAS                                                                     |
| Azma K., et al. (2018)             | 27 | 62.5   | 8.8   | 27  | 62.5  | 9.5   | *Instrument: VAS                                                                     |
| Chhabra H. S., et al. (2018).      | 45 | 3.3    | 1.7   | 48  | 3.2   | 2.7   | *Instrument: Numeric Pain Rating Scale (NPRS)                                        |
| <b>Oncology</b>                    |    |        |       |     |       |       |                                                                                      |
| Galiano-Castillo N., et al. (2016) | 39 | 2.53   | 2.16  | 37  | 4.12  | 2.13  | *Instrument: Brief Pain Inventory short form                                         |
| <b>Rheumatologic</b>               |    |        |       |     |       |       |                                                                                      |
| Piga M., et al. (2014)             | 18 | 32.85  | 28.36 | 15  | 53.68 | 32.35 | *Instrument: VAS; *Combination of Systemic Sclerosis and Rheumatoid Arthritis groups |
| <b>Cardiovascular</b>              |    |        |       |     |       |       |                                                                                      |
| Piotrowicz E., et al. (2015)       | 75 | 2.66   | 2.22  | 56  | 2     | 2.07  | *Instrument: SF-36 Subscale pain                                                     |
| Salvetti X. M., et al. (2008)      | 19 | 97.68  | 7.22  | 20  | 64.8  | 17.22 | *Instrument: SF-36 Subscale pain                                                     |

1.2 Pain Short-term (Telerehabilitation x Other Interventions)

| Study | EG | OI | Comments |
|-------|----|----|----------|
|-------|----|----|----------|

|                              | n   | Mean | SD   | n   | Mean | SD   |                                                        |
|------------------------------|-----|------|------|-----|------|------|--------------------------------------------------------|
| <b>Musculoskeletal</b>       |     |      |      |     |      |      |                                                        |
| Allen K. D., et al. (2010)   | 172 | 4.8  | 2.37 | 171 | 5.8  | 2.37 | * Instrument: VAS; * Imputed from confidence intervals |
| Bennell K. L., et al. (2017) | 72  | 4.2  | 3    | 70  | 5.7  | 3.6  | * Instrument: WOMAC subscale pain                      |
| Calner T., et al. (2017)     | 48  | 59.4 | 21.4 | 35  | 54.9 | 23   | * Instrument: VAS                                      |
| Damush T. M., et al. (2003)  | 76  | 4.7  | 2.8  | 87  | 4.9  | 2.6  | * Instrument: AIMS2 subscale Pain                      |
| <b>Oncology</b>              |     |      |      |     |      |      |                                                        |
| Ligibel J. A., et al. (2012) | 48  | -4.9 | 17.5 | 51  | -2.6 | 27.4 | * Instrument: EORTC QLQ C-30 subscale pain             |

## 1.3 Pain Long-term (Telerehabilitation x Other Interventions)

| Study                           | EG |       |       | CG |       |       | Comments                         |
|---------------------------------|----|-------|-------|----|-------|-------|----------------------------------|
|                                 | n  | Mean  | SD    | n  | Mean  | SD    |                                  |
| <b>Musculoskeletal</b>          |    |       |       |    |       |       |                                  |
| Hong J., et al. (2017)          | 11 | 193.1 | 36.2  | 12 | 175.6 | 42.1  | *Instrument: Senior Fitness Test |
| <b>Oncology</b>                 |    |       |       |    |       |       |                                  |
| Alibhai S. M. H., et al. (2014) | 21 | 106   | 229.4 | 17 | 140.6 | 188.1 | *Instrument: 6MWT                |
| <b>Cardiovascular</b>           |    |       |       |    |       |       |                                  |
| Chien C. L., et al. (2011)      | 22 | 433   | 145   | 22 | 429   | 93    | *Instrument: 6MWT                |

## 2.1 Physical Function Short-term (Telerehabilitation x Control)

| Study                            | EG  |       |       | OI  |       |       | Comments                                          |
|----------------------------------|-----|-------|-------|-----|-------|-------|---------------------------------------------------|
|                                  | n   | Mean  | SD    | n   | Mean  | SD    |                                                   |
| <b>Pulmonary</b>                 |     |       |       |     |       |       |                                                   |
| Bourne S., et al. (2017)         | 64  | 433.6 | 102.9 | 26  | 445.1 | 124.9 | * Instrument: 6MWT                                |
| Demeyer H., et al. (2017)        | 159 | 457   | 108   | 159 | 449   | 118   | * Instrument: 6MWT                                |
| Hornikx M., et al. (2015)        | 12  | 67    | 84    | 15  | 64    | 59    | * Instrument: 6MWT                                |
| Tsai L. L., et al. (2017)        | 19  | 403   | 82    | 17  | 374   | 136   | * Instrument: 6MWT                                |
| <b>Postoperative orthopaedic</b> |     |       |       |     |       |       |                                                   |
| Chen M., et al. (2016)           | 94  | 20.7  | 8.2   | 93  | 21.5  | 8.6   | * Instrument: WOMAC Subscale Physical function    |
| Moffet H., et al. (2015)         | 98  | 373.2 | 5.9   | 100 | 362   | 5.9   | * Instrument: 6MWT; *Imputed from standard errors |
| Piqueras M., et al. (2013)       | 72  | 3.36  | 5.38  | 70  | -5.22 | 6.25  | * Instrument: TUG                                 |
| Pastora-Bernal JM (2018)         | 8   | 15.5  | 0.46  | 10  | 17.7  | 0.59  | * Instrument: Subscale Function Constant-         |

|                                     |    |        |        |    |        |        |                                                                                       |
|-------------------------------------|----|--------|--------|----|--------|--------|---------------------------------------------------------------------------------------|
|                                     |    |        |        |    |        |        | Murley Test                                                                           |
| Kalron A., et al. (2018)            | 15 | -11.7  | 11     | 17 | -19.2  | 11.3   | * Instrument: TUG                                                                     |
| <b>Cardiovascular</b>               |    |        |        |    |        |        |                                                                                       |
| Hwang R., et al. (2017)             | 24 | 364    | 96     | 26 | 394    | 119    | * Instrument: 6MWT                                                                    |
| Piotrowicz E., et al. (2015)        | 75 | -21.6  | 9.65   | 56 | -23.2  | 10.71  | *Instrument: SF-36 Subscale Physical Function                                         |
| Peng X., et al. (2018)              | 49 | 419.23 | 9.67   | 49 | 406.55 | 12.54  | *Instrument: 6MWT                                                                     |
| Kraal J. J., et al. (2014)          | 25 | 6.1    | 0.5    | 25 | 5.8    | 0.7    | *Instrument: MacNew questionnaire                                                     |
| Salveti X. M., et al. (2008)        | 19 | 97.32  | 2.63   | 20 | 78     | 23.81  | *Instrument: SF-36 Subscale Physical Function                                         |
| Varnfield. M., et al. (2014)        | 48 | 570    | 80     | 28 | 584    | 99     | *Instrument: 6MWT                                                                     |
| O'Brien. J., et al. (2017)          | 29 | 16.75  | 5.14   | 30 | 21     | 4.44   | *Instrument: Tinetti Gait and Balance; *Imputed from medians and interquartile ranges |
| Fang, J., et al. (2019)             | 33 | 420.65 | 33.7   | 34 | 396.12 | 36.42  | *Instrument: 6MWT                                                                     |
| <b>Neurology</b>                    |    |        |        |    |        |        |                                                                                       |
| Chumbler. N., et al. (2012)         | 22 | 82.7   | 9.7    | 22 | 79     | 15     | *Instrument: FONEFIM                                                                  |
| Jing. C., et al. (2017)             | 26 | 37.04  | 3.78   | 25 | 36.08  | 5.31   | *Instrument: Berg Balance Scale                                                       |
| Paul, L., et al. (2019)             | 39 | 43.7   | 11.2   | 40 | 42.8   | 9.22   | *Instrument: Berg Balance Scale                                                       |
| <b>Oncology</b>                     |    |        |        |    |        |        |                                                                                       |
| Galiano-Castillo. N., et al. (2017) | 39 | 417.55 | 219.06 | 37 | 313.64 | 144.17 | *Instrument: 6MWT                                                                     |
| Galiano-Castillo. N., et al. (2016) | 39 | 86.84  | 12.56  | 37 | 71.53  | 17.33  | *Instrument: EORTC subscale Physical Function                                         |
| Ariza-Garcia, A., et al. (2019)     | 19 | 483.46 | 149.37 | 20 | 453.79 | 99.98  | *Instrument: 6MWT                                                                     |
| <b>Musculoskeletal</b>              |    |        |        |    |        |        |                                                                                       |
| Odole. A. C. and O. D. Ojo (2013)   | 25 | 83.7   | 10.26  | 25 | 84.87  | 10.79  | *Instrument: Ibadan Knee/Hip Osteoarthritis Outcome Measure (IKHOAM)                  |
| Azma. K., et al. (2018)             | 27 | 67.1   | 22.6   | 27 | 75     | 24.1   | *Instrument: WOMAC                                                                    |
| Chhabra. H. S., et al. (2018).      | 45 | 20.2   | 17.8   | 48 | 29.9   | 20.1   | *Instrument: Modified Oswestry Disability Index (MODI)                                |
| Iles. R., et al. (2011)             | 13 | 8.3    | 2.1    | 13 | 5.2    | 3.4    | *Instrument: Patient Specific Functional Scale                                        |
| <b>Multiple conditions</b>          |    |        |        |    |        |        |                                                                                       |
| Jackson. J. C., et al. (2012)       | 7  | -9.76  | 3.03   | 8  | -10.36 | 2.23   | *Instrument: TUG; *Imputed from medians and interquartile ranges                      |
| <b>Rheumatologic</b>                |    |        |        |    |        |        |                                                                                       |

|                                       |    |        |      |    |       |        |                                                                                                       |
|---------------------------------------|----|--------|------|----|-------|--------|-------------------------------------------------------------------------------------------------------|
| Piga. M., et al. (2014)               | 18 | 8.8    | 5.12 | 15 | 11.18 | 7.79   | *Instrument: Dreiser's Functional; *Combination of Systemic Sclerosis and Rheumatoid Arthritis groups |
| <b>Endocrine</b>                      |    |        |      |    |       |        |                                                                                                       |
| Duruturk, N. and M. A. Ozkoslu (2019) | 23 | 554.39 | 139  | 21 | 450.9 | 165.81 | *Instrument: 6MWT                                                                                     |

## 2.2 Physical Function Short-term (Telerehabilitation x Other Interventions)

| Study                             | EG  |         |        | OI  |         |        | Comments                                                               |
|-----------------------------------|-----|---------|--------|-----|---------|--------|------------------------------------------------------------------------|
|                                   | n   | Mean    | SD     | n   | Mean    | SD     |                                                                        |
| <b>Musculoskeletal</b>            |     |         |        |     |         |        |                                                                        |
| Allen. K. D., et al. (2010)       | 172 | -2.5    | 1.18   | 171 | -2.6    | 1.17   | * Instrument: AIMS2 subscale physical function; *Imputed from p-values |
| Bennell. K. L., et al. (2017)     | 72  | -14.7   | 10.6   | 70  | -18.3   | 11.9   | *Instrument: WOMAC subscale physical function                          |
| Calner. T., et al. (2017)         | 48  | 52.1    | 24.5   | 35  | 65.9    | 22.2   | *Instrument: SF-36 Subscale Physical Function                          |
| Damush. T. M., et al. (2003)      | 76  | -2      | 1.5    | 87  | -2      | 2.5    | *Instrument: AIMS2 Subscale Physical Function                          |
| Hinman, R. S., et al. (2019)      | 87  | 10.8    | 9.2    | 88  | 5.8     | 10.5   | *Instrument: WOMAC subscale physical function                          |
| <b>Postoperative orthopaedic</b>  |     |         |        |     |         |        |                                                                        |
| Bini. S. A. and J. Mahajan (2017) | 14  | -17.591 | 17.148 | 15  | -17.251 | 14.201 | *Instrument: KOOS                                                      |
| <b>Pulmonary</b>                  |     |         |        |     |         |        |                                                                        |
| Brooks. D., et al. (2002)         | 18  | 345     | 22.79  | 21  | 370     | 24.62  | *Instrument: 6MWT; *Imputed from p-values                              |
| <b>Neurology</b>                  |     |         |        |     |         |        |                                                                        |
| Conroy. S. S., et al. (2018)      | 16  | 879.2   | 611.5  | 8   | 1330.8  | 372    | *Instrument: 6MWT                                                      |
| Paul. L., et al. (2014)           | 15  | -24.32  | 21.85  | 14  | -15.1   | 5.37   | *Instrument: TUG                                                       |
| Ellis. T. D., et al. (2019)       | 23  | 536     | 92.4   | 21  | 546.9   | 105.5  | *Instrument: 6MWT                                                      |
| <b>Cardiovascular</b>             |     |         |        |     |         |        |                                                                        |
| Frederix. I., et al. (2015)       | 69  | 2.52    | 0.52   | 71  | 2.28    | 0.63   | *Instrument: HeartQol subscale physical function                       |
| Stewart. A. V., et al. (2003)     | 41  | 499     | 95     | 42  | 463     | 86     | *Instrument: 6MWT                                                      |
| <b>Oncology</b>                   |     |         |        |     |         |        |                                                                        |
| Ligibel. J. A., et al. (2012)     | 48  | 186.9   | 215.1  | 51  | 81.9    | 135.2  | *Instrument: 6MWT                                                      |
| <b>Endocrine</b>                  |     |         |        |     |         |        |                                                                        |
| Morey. M. C., et al. (2012)       | 180 | 518.3   | 127.4  | 122 | 517.2   | 129.1  | *Instrument: 6MWT                                                      |

| Multiple conditions        |    |     |     |    |     |                      |
|----------------------------|----|-----|-----|----|-----|----------------------|
| Jansons. P., et al. (2017) | 39 | 385 | 127 | 46 | 409 | 84 *Instrument: 6MWT |

## 2.3 Physical Function Long-term (Telerehabilitation x Other Interventions)

| Study                            | EG |       |       | CG |       |      | Comments                                                       |
|----------------------------------|----|-------|-------|----|-------|------|----------------------------------------------------------------|
|                                  | n  | Mean  | SD    | n  | Mean  | SD   |                                                                |
| <b>Oncology</b>                  |    |       |       |    |       |      |                                                                |
| Alibhai. S. M. H., et al. (2014) | 21 | 0.5   | 12.7  | 17 | 11.7  | 20.1 | *Instrument: QLQ-C30                                           |
| <b>Cardiovascular</b>            |    |       |       |    |       |      |                                                                |
| Chien. C. L., et al. (2011)      | 22 | -7    | 9     | 22 | -13   | 13   | *Instrument: Minnesota living with heart failure questionnaire |
| <b>Urology</b>                   |    |       |       |    |       |      |                                                                |
| Sari. D. and L. Khorshid (2009)  | 17 | 23.19 | 11.43 | 17 | -5.74 | 6.26 | *Instrument: I-QOL                                             |

## 3.1 Quality of life Short-term (Telerehabilitation x Control)

| Study                             | EG |        |        | OI |        |        | Comments                                                             |
|-----------------------------------|----|--------|--------|----|--------|--------|----------------------------------------------------------------------|
|                                   | n  | Mean   | SD     | n  | Mean   | SD     |                                                                      |
| <b>Pulmonary</b>                  |    |        |        |    |        |        |                                                                      |
| Bourne. S., et al. (2017)         | 64 | 39.3   | 18.5   | 26 | 39.3   | 18.5   | *Instrument: ST Georges Respiratory Questionnaire (SGRQ)             |
| Holland. A. E., et al. (2017)     | 72 | 2.99   | 5.54   | 76 | 2.09   | 5.45   | *Instrument: CRDQ                                                    |
| Tsai. L. L., et al. (2017)        | 19 | 99     | 16     | 17 | 90     | 18     | *Instrument: CRDQ                                                    |
| <b>Urology</b>                    |    |        |        |    |        |        |                                                                      |
| Carrion Perez. F., et al. (2015). | 10 | 7.83   | 4.73   | 9  | 9      | 2.62   | *Instrument: ICIQ-SF; *Imputed from medians and interquartile ranges |
| <b>Cardiovascular</b>             |    |        |        |    |        |        |                                                                      |
| Hwang. R., et al. (2017)          | 24 | -32    | 19     | 26 | -35    | 24     | *Instrument: Minnesota living with heart failure questionnaire       |
| Piotrowicz. E., et al. (2015)     | 75 | -69.2  | 26.44  | 56 | -70.5  | 25.4   | *Instrument: SF-36                                                   |
| Peng. X., et al. (2018)           | 49 | -43.11 | 8.76   | 49 | -49.2  | 12.44  | *Instrument: Minnesota living with heart failure questionnaire       |
| Salveti. X. M., et al. (2008)     | 19 | 89.05  | 11.28  | 20 | 66.85  | 21.25  | *Instrument: SF-36                                                   |
| Varnfield. M., et al. (2014)      | 48 | 0.94   | 0.0764 | 28 | 0.8066 | 0.1562 | *Instrument: EQ-5D; *Imputed from medians and interquartile ranges   |
| Kraal. J. J., et al. (2014)       | 25 | 6.1    | 0.5    | 25 | 5.8    | 0.7    | *Instrument: MacNew questionnaire                                    |
| O'Brien. J., et al. (2017)        | 29 | 45     | 24.2   | 30 | 46.33  | 17.68  | *Instrument: SF-8                                                    |

|                                     |     |       |       |     |       |       |                                                                                           |
|-------------------------------------|-----|-------|-------|-----|-------|-------|-------------------------------------------------------------------------------------------|
| Fang, J., et al. (2019)             | 33  | 68.7  | 6.65  | 34  | 63.14 | 8.92  | *Instrument: SF-36                                                                        |
| <b>Oncology</b>                     |     |       |       |     |       |       |                                                                                           |
| Galiano-Castillo, N., et al. (2016) | 39  | 81.42 | 19.97 | 37  | 61.47 | 26.49 | *Instrument: EORTC                                                                        |
| <b>Rheumatologic</b>                |     |       |       |     |       |       |                                                                                           |
| Piga, M., et al. (2014)             | 18  | 41.2  | 11.09 | 15  | 43.4  | 14.65 | *Instrument: SF-36;<br>*Combination of Systemic Sclerosis and Rheumatoid Arthritis groups |
| <b>Musculoskeletal</b>              |     |       |       |     |       |       |                                                                                           |
| Azma, K., et al. (2018)             | 27  | 133.3 | 88.9  | 27  | 133.3 | 90.1  | *Instrument: KOOS subscale Quality of Life                                                |
| <b>Neurology</b>                    |     |       |       |     |       |       |                                                                                           |
| Fjeldstad-Pardo, C., et al. (2018)  | 121 | 45.64 | 23.9  | 121 | 44.09 | 19.83 | *Instrument: SF-36                                                                        |
| Paul, L., et al. (2019)             | 39  | 0.73  | 0.13  | 40  | 0.71  | 0.16  | *Instrument: EQ-5D                                                                        |
| <b>Postoperative orthopaedic</b>    |     |       |       |     |       |       |                                                                                           |
| Chen M. et al. (2016)               | 94  | 47.8  | 7.15  | 93  | 45.4  | 6.55  | *Instrument: SF-36                                                                        |
| Moffet, H., et al. (2015)           | 98  | 63.9  | 1.9   | 100 | 61.3  | 1.9   | *Instrument: KOOS subscale quality of life; *Imputed from standard errors                 |

## 3.2 Quality of life Short-term (Telerehabilitation x Other Interventions)

| Study                         | EG |       |       | OI  |        |      | Comments                                                                              |
|-------------------------------|----|-------|-------|-----|--------|------|---------------------------------------------------------------------------------------|
|                               | n  | Mean  | SD    | n   | Mean   | SD   |                                                                                       |
| <b>Musculoskeletal</b>        |    |       |       |     |        |      |                                                                                       |
| Calner, T., et al. (2017)     | 48 | 46.32 | 24.46 | 35  | 52.68  | 25.8 | *Instrument: SF-36                                                                    |
| Bennell, K. L., et al. (2017) | 72 | 0.8   | 0.1   | 70  | 0.8    | 0.1  | *Instrument: AQoL II                                                                  |
| Hinman, R. S., et al. (2019)  | 87 | 0     | 0.1   | 88  | -0.1   | 0.1  | *Instrument: Assessment of Quality of Life (AQoL)<br>*Change within groups            |
| <b>Pulmonary</b>              |    |       |       |     |        |      |                                                                                       |
| Brooks, D., et al. (2002)     | 18 | -47   | 1.94  | 9   | -49    | 1.37 | *Instrument: ST Georges Respiratory Questionnaire (SGRQ); *Imputed from p-values      |
| <b>Cardiovascular</b>         |    |       |       |     |        |      |                                                                                       |
| Frederix, I., et al. (2015)   | 69 | 2.53  | 0.44  | 71  | 2.32   | 0.58 | *Instrument: HeartQoL                                                                 |
| <b>Oncology</b>               |    |       |       |     |        |      |                                                                                       |
| Ligibel, J. A., et al. (2012) | 48 | 4.3   | 16    | 51  | -1.5   | 18.8 | *Instrument: EORTC QLQ C-30                                                           |
| Hayes, S. C., et al. (2013)   | 67 | 125.6 | 19.42 | 127 | 127.57 | 19.7 | *Instrument: FACT-B +4; *Combined data in the control group (FtF + UC); *Imputed from |

|                             |    |      |      |    |       |      | confidence intervals                         |
|-----------------------------|----|------|------|----|-------|------|----------------------------------------------|
| <b>Neurology</b>            |    |      |      |    |       |      |                                              |
| Paul. L., et al. (2014)     | 15 | 10.2 | 4.71 | 14 | 10.71 | 4.53 | *Instrument: LEEDS QoL                       |
| Ellis. T. D., et al. (2019) | 23 | 11.4 | 5.9  | 21 | 13.4  | 8.1  | *Instrument: Parkinson Disease Questionnaire |
| <b>Multiple conditions</b>  |    |      |      |    |       |      |                                              |
| Jansons. P., et al. (2017)  | 39 | 72   | 17   | 46 | 68    | 17   | *Instrument: VAS EQ-5D                       |

3.3 Quality of life Long-term (Telerehabilitation x Other Interventions)
