# Supplementary material for: Effectiveness of exercises by telerehabilitation on pain, physical function and quality of life in people with physical disabilities: a systematic review of randomised controlled trials with GRADE recommendations
Source: HighWire-hosted journal article supplement (doi:10.1136/bjsports-2019-101375), 2020-10-15
Supplement: bjsports-2019-101375supp004_data_supplement.pdf [file bjsports-2019-101375supp004_data_supplement.pdf]

**Supplementary 3.** Funnel plots for pain, physical function and quality of life.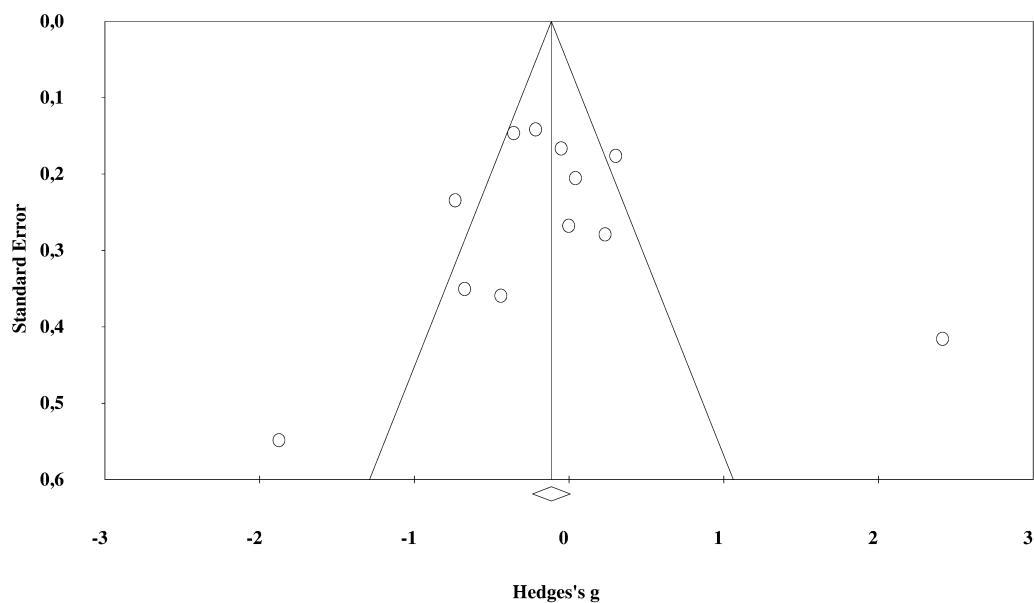

Figure 1.1 Funnel plot pain at short-term. Egger test: Intercept = 0.3925 (95% CI = -4.2 to 5.1;  $p > 0.427$ ).

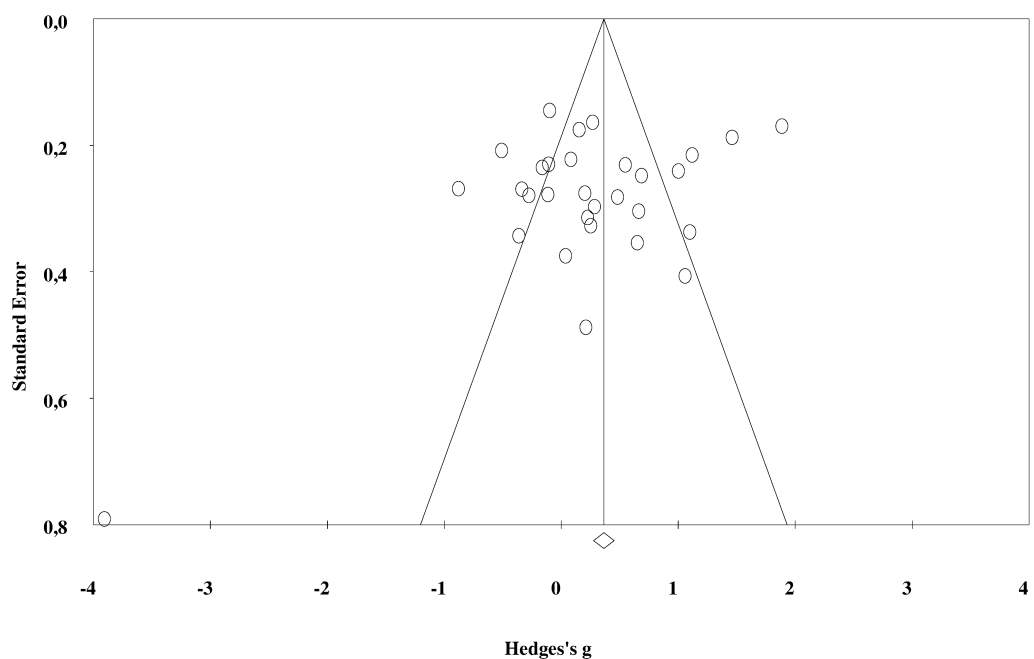

Figure 1.2 Funnel plot physical function at short-term. Egger test: Intercept = -2.5065 (95% CI = -6.1 to 1.2;  $p > 0.085$ ).

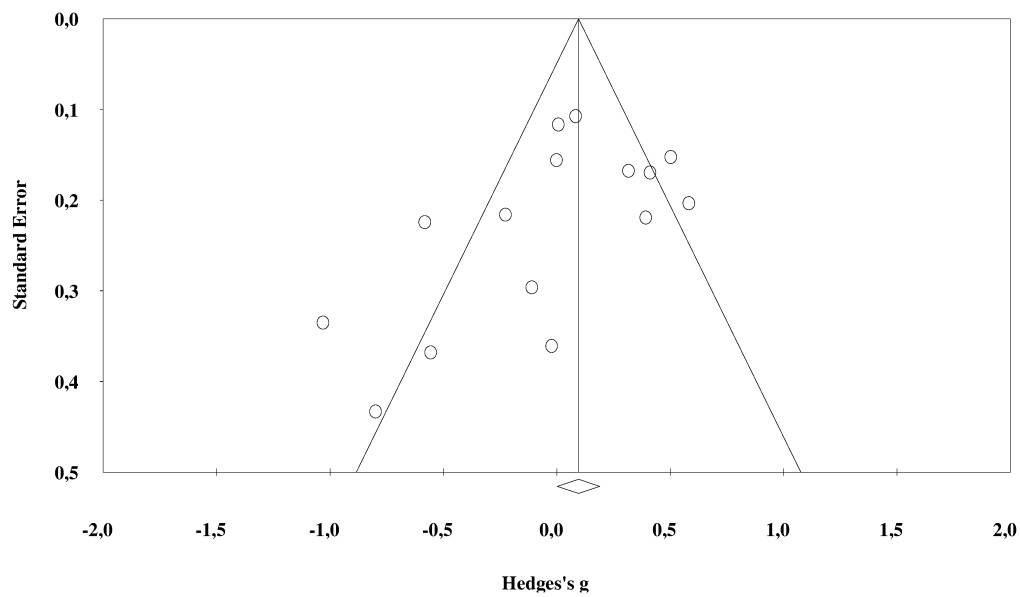

Figure 1.3 Funnel plot physical function at long-term. Egger test: Intercept = -2.1506 (95% CI = -4.8 to 0.5;  $p > 0.052$ ).

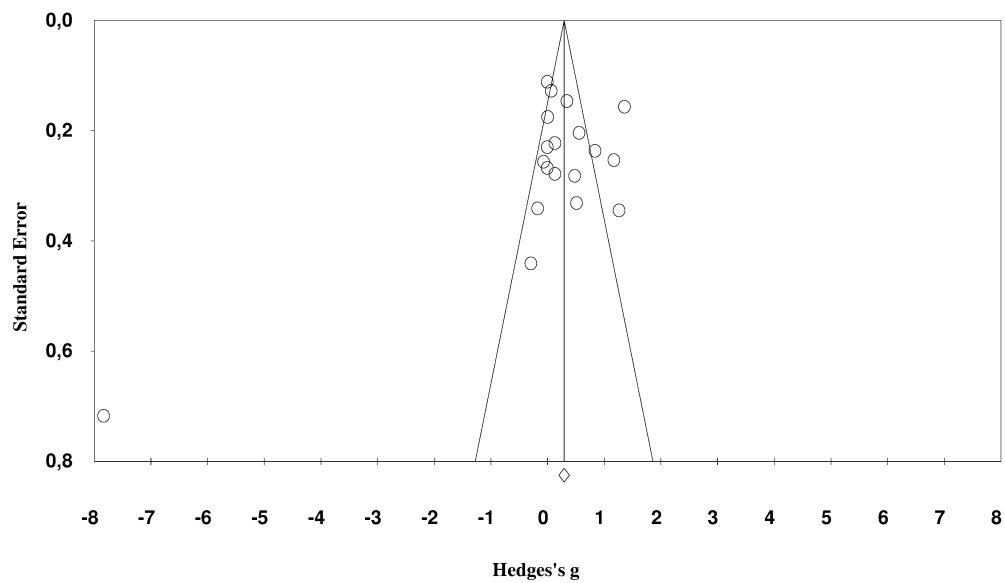

Figure 1.4 Funnel plot quality of life at short-term. Egger test: Intercept = -2.2507 (95% CI = -9.7 to 2.2;  $p > 0.148$ ).

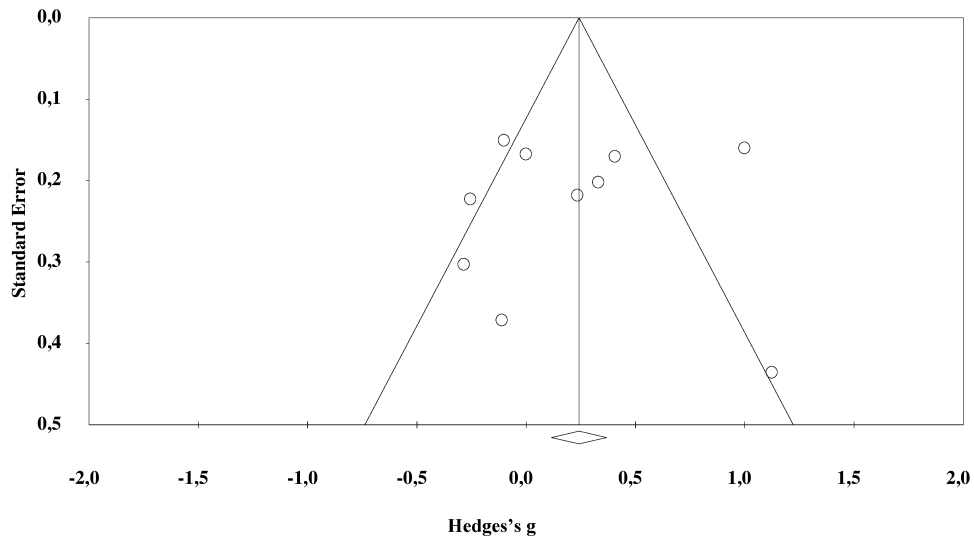

Figure 1.5 Funnel plot quality of life at long-term. Egger test: Intercept = -0.5593 (95% CI = -6.3 to 5.2;  $p > 0.414$ ).
