# Supplementary material for: Effectiveness of exercises by telerehabilitation on pain, physical function and quality of life in people with physical disabilities: a systematic review of randomised controlled trials with GRADE recommendations
Source: HighWire-hosted journal article supplement (doi:10.1136/bjsports-2019-101375), 2020-10-15

**Supplementary 4.** Sensitivity analyses removing poor-quality trials (PEDro < 6 out of 10) for pain, physical function and quality of life. In parentheses: number of trials, total number of participants, P

**SENSITIVITY ANALYSIS**

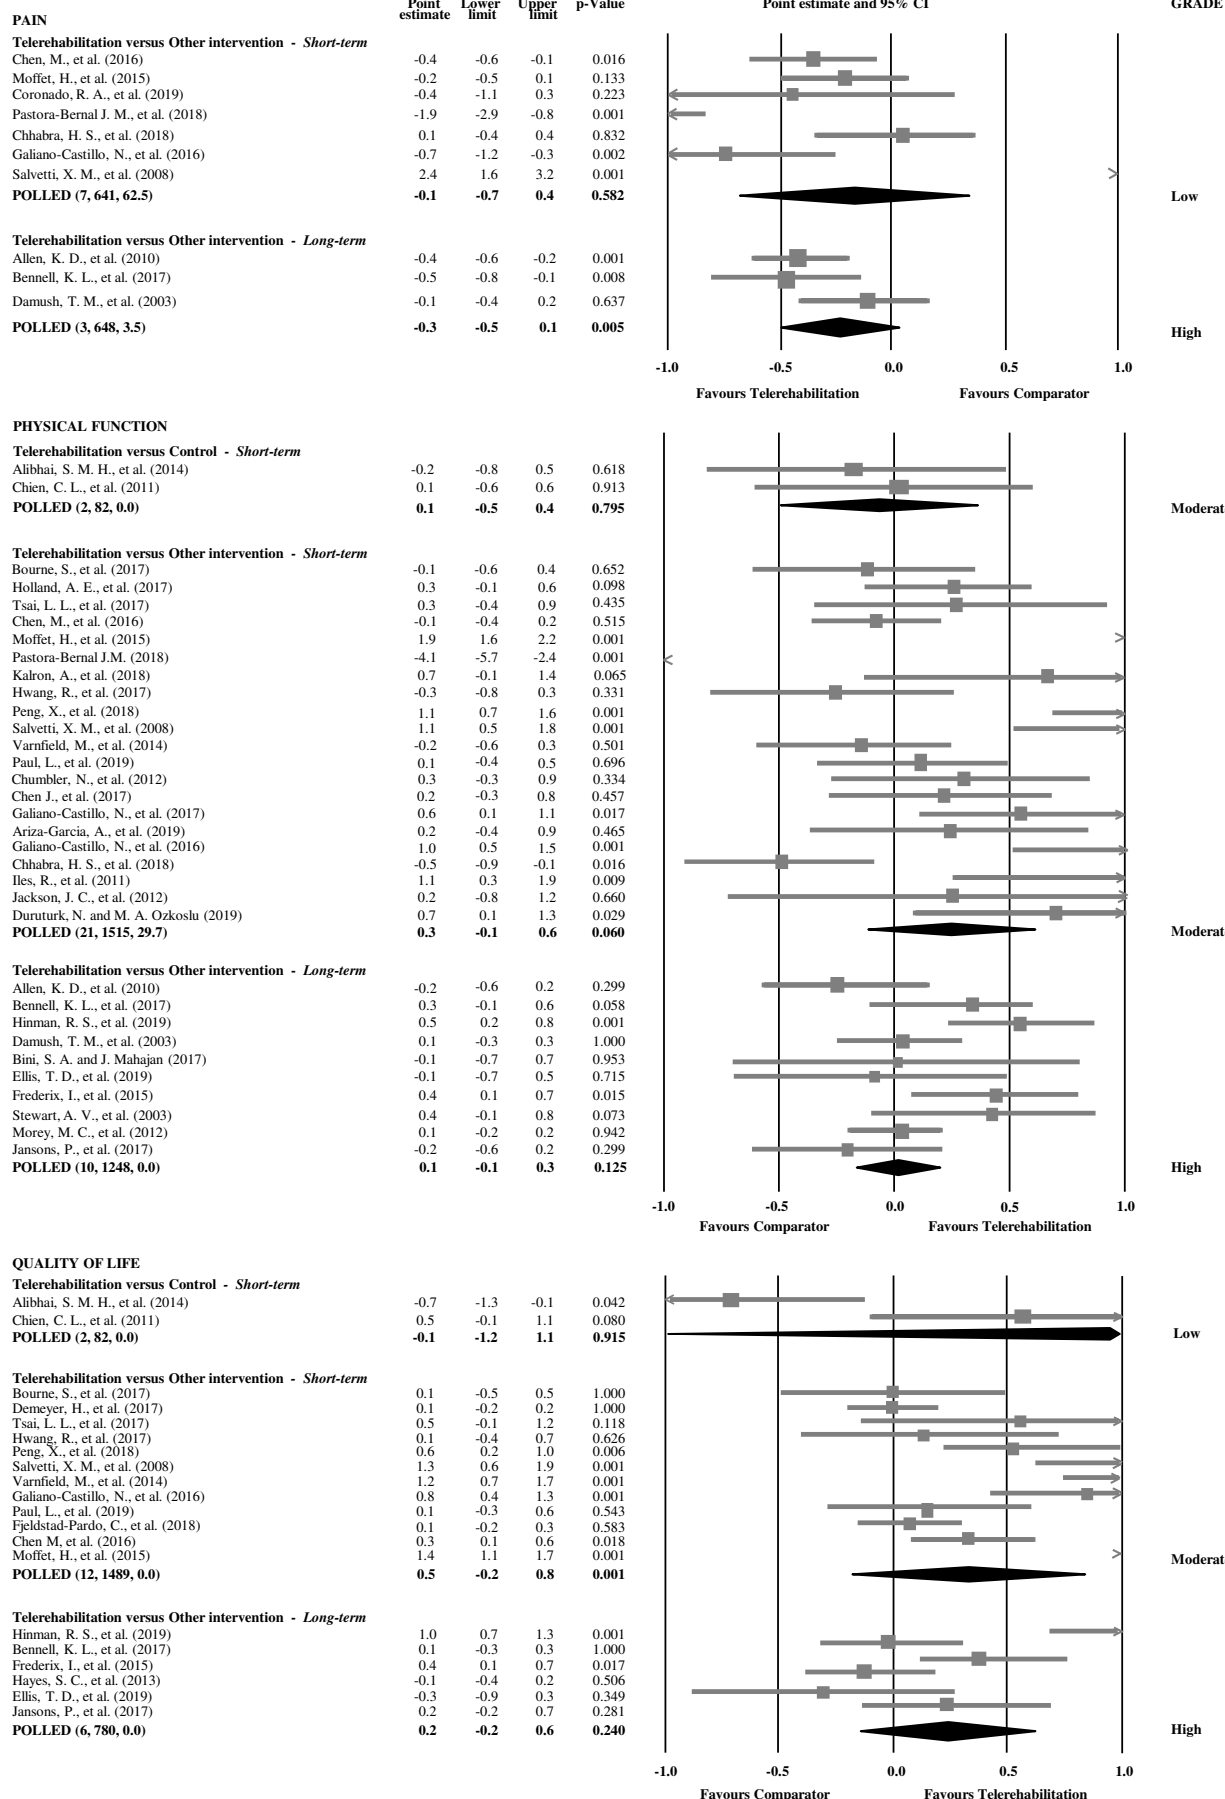

Supplement: bjsports-2019-101375supp005_data_supplement.pdf [file bjsports-2019-101375supp005_data_supplement.pdf]
